# Supplementary material
Source: MDPI journal article supplement (https://www.mdpi.com/2073-4395/12/12/3017)
Supplement: s1 [file s1 › agronomy-2022895-supplementary.pdf]

**Table S1.** Analysis of variance for the effect of insecticides as a contact and systemic applications and their combinations on *H. armigera* larvae.

| <i>Source of variation</i>  | <i>DF</i> | <i>Sum of Squares</i> | <i>Mean Square</i> | <i>F</i> | <i>P-Value</i> |
|-----------------------------|-----------|-----------------------|--------------------|----------|----------------|
| <i>Contact application</i>  |           |                       |                    |          |                |
| <i>Insecticides</i>         | 6         | 125405.7              | 20901.0            | 93.07    | <0.001         |
| <i>Time</i>                 | 5         | 16998.1               | 3399.6             | 15.14    | <0.001         |
| <i>Insecticides x Time</i>  | 30        | 18708.6               | 623.6              | 2.78     | <0.001         |
| <i>Residual</i>             | 164       | 36830.5               | 224.6              |          |                |
| <i>Systemic application</i> |           |                       |                    |          |                |
| <i>Insecticides</i>         | 6         | 86693.3               | 14448.9            | 74.52    | <0.001         |
| <i>Time</i>                 | 5         | 50272.4               | 10054.5            | 51.86    | <0.001         |
| <i>Insecticides x Time</i>  | 30        | 44941.0               | 1498.0             | 7.73     | <0.001         |
| <i>Residual</i>             | 164       | 31798.1               | 193.9              |          |                |

**Table S2.** Analysis of variance for the effect of insecticides tested under field condition on mean number of *H. armigera* larvae and on pod damage and their combinations with exposure time.

| <i>Source of variation</i>          | <i>DF</i> | <i>Sum of Squares</i> | <i>Mean Square</i> | <i>F</i> | <i>P-Value</i> |
|-------------------------------------|-----------|-----------------------|--------------------|----------|----------------|
| <i>Live larvae</i>                  |           |                       |                    |          |                |
| <i>Insecticides</i>                 | 4         | 174.1714              | 43.5429            | 105.42   | <0.001         |
| <i>Time</i>                         | 6         | 66.2714               | 11.0452            | 26.74    | <0.001         |
| <i>Insecticides x exposure time</i> | 24        | 42.2286               | 1.7595             | 4.26     | <0.001         |
| <i>Residual</i>                     | 102       | 42.1286               | 0.4130             |          |                |
| <i>Pod damage</i>                   |           |                       |                    |          |                |
| <i>Insecticides</i>                 | 4         | 3332.7                | 833.2              | 8.03     | <0.001         |
| <i>Time</i>                         | 2         | 656.4                 | 328.2              | 3.16     | 0.044          |
| <i>Insecticides x Time</i>          | 8         | 2575.8                | 322.0              | 3.10     | 0.002          |
| <i>Residual</i>                     | 250       | 25948.4               | 103.8              |          |                |
